# Supplementary material for: 5-Hydroxy-7-azaindolin-2-one, a novel hybrid of pyridinol and sunitinib: design, synthesis and cytotoxicity against cancer cells
Source: Royal Society of Chemistry journal article supplement (doi:10.1039/c6ob00406g), 2016-01-01

## Supplementary Information

### 5-Hydroxy-7-azaindolin-2-one, a novel hybrid of pyridinol and sunitinib: design, synthesis and cytotoxicity against cancer cells

Sajita Shah,<sup>a,†</sup> Chaemin Lee,<sup>a,†</sup> Hyukjae Choi,<sup>a</sup> Jaya Gautam,<sup>a</sup> Hyeonjin Jang,<sup>a</sup> Geum Jin Kim,<sup>a</sup> Yu-Jeong Lee,<sup>a</sup> Chhabi Lal Chaudhary,<sup>a</sup> Sang Won Park,<sup>b</sup> Tae-gyu Nam,<sup>b,\*</sup> Jung-Ae Kim<sup>a,\*</sup> and Byeong-Seon Jeong<sup>a,\*</sup>

<sup>a</sup>College of Pharmacy and Institute for Drug Research, Yeungnam University, Gyeongsan 38541, Republic of Korea

<sup>b</sup>Department of Pharmacy and Institute of Pharmaceutical Science and Technology, Hanyang University, Ansan, Gyeonggi-do 15588, Republic of Korea

<sup>†</sup>These authors contributed equally to this work.

---

#### Contents

- Synthesis of *N*-cyclohexyl-5-formyl-2,4-dimethyl-1*H*-pyrrole-3-carboxamide (25)
- <sup>1</sup>H- and <sup>13</sup>C-NMR spectra of the products (25, 6A–6J)
- 2D-NMR data of 6D
- 1D-NMR data assignment of 6D
- HPLC chromatogram of 6A–6J

### Synthesis of *N*-cyclohexyl-5-formyl-2,4-dimethyl-1*H*-pyrrole-3-carboxamide (**25**)

To a solution of ethyl 5-formyl-2,4-dimethyl-1*H*-pyrrole-3-carboxylate (**22**) (50 mg, 0.299 mmol) in DMF (2 mL) were added 1-ethyl-3-(3-dimethylaminopropyl)carbodiimide hydrochloride (EDCI, 86 mg, 0.449 mmol), hydroxybenzotriazole (61 mg, 0.449 mmol), triethylamine (83  $\mu$ L, 0.598 mmol) and cyclohexylamine (41  $\mu$ L, 0.359 mmol). The resulting mixture was stirred at room temperature for 12 h and then concentrated *in vacuo*. After dilution of the residue with water (1 mL), brine (1 mL), and sat. aq. NaHCO<sub>3</sub> (1 mL), pH of the resulting solution was adjusted to 10 using 6 M aq. NaOH. Extraction of the product was performed using mixed solvent (10% methanol in dichloromethane) several times, and the extract was dried over anhydrous magnesium sulfate and filtered. The filtrate was concentrated *in vacuo* and the residue was purified by silica gel column chromatography (CHCl<sub>3</sub>:MeOH=15:1) to give **25** (66 mg, 89% yield) as an orange solid. <sup>1</sup>H-NMR (250 MHz, DMSO)  $\delta$  11.81 (s, 1H), 9.52 (s, 1H), 7.45 (d, *J* = 8.0 Hz, 1H), 3.68 (d, *J* = 7.3 Hz, 1H), 2.33 (s, 3H), 2.27 (s, 3H), 1.81–1.66 (m, 4H), 1.59–1.55 (m, 2H), 1.26 (d, *J* = 8.2 Hz, 4H). <sup>13</sup>C-NMR (62.5 MHz, DMSO)  $\delta$  178.0, 164.4, 138.3, 131.6, 128.5, 121.0, 48.5, 33.4 (2C), 26.1, 25.6 (2C), 13.1, 10.3. MS (ESI) 248 [M]<sup>+</sup>.

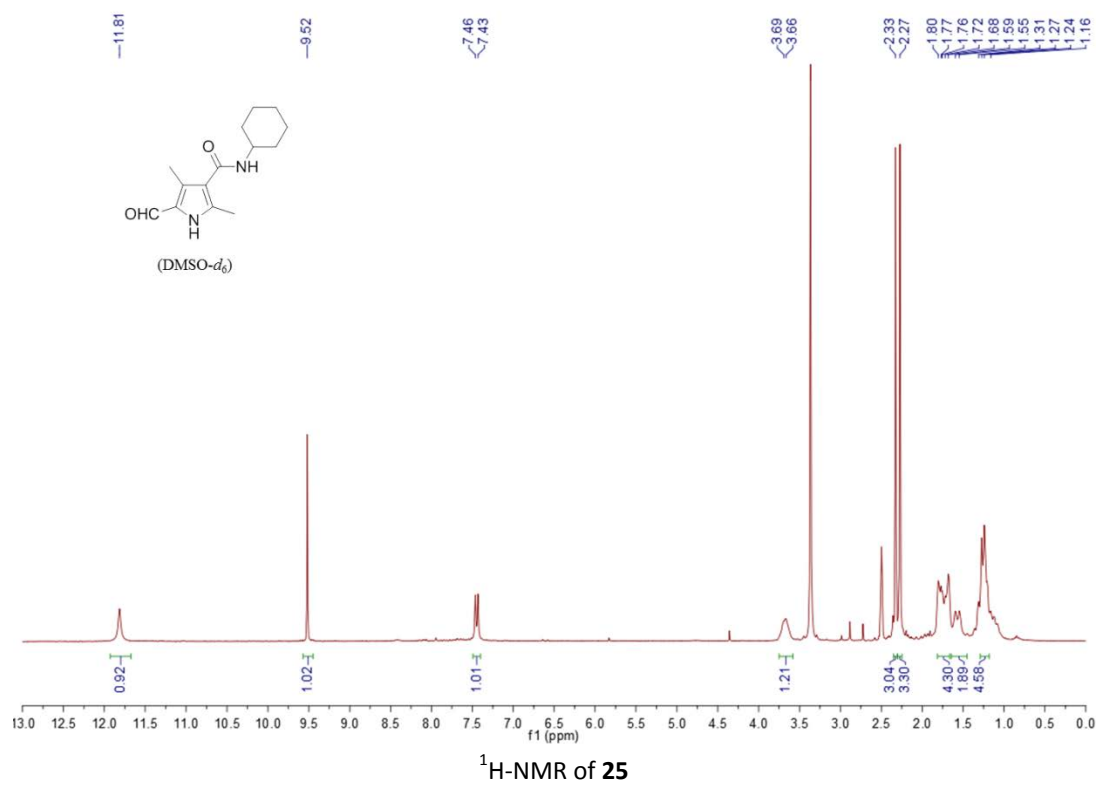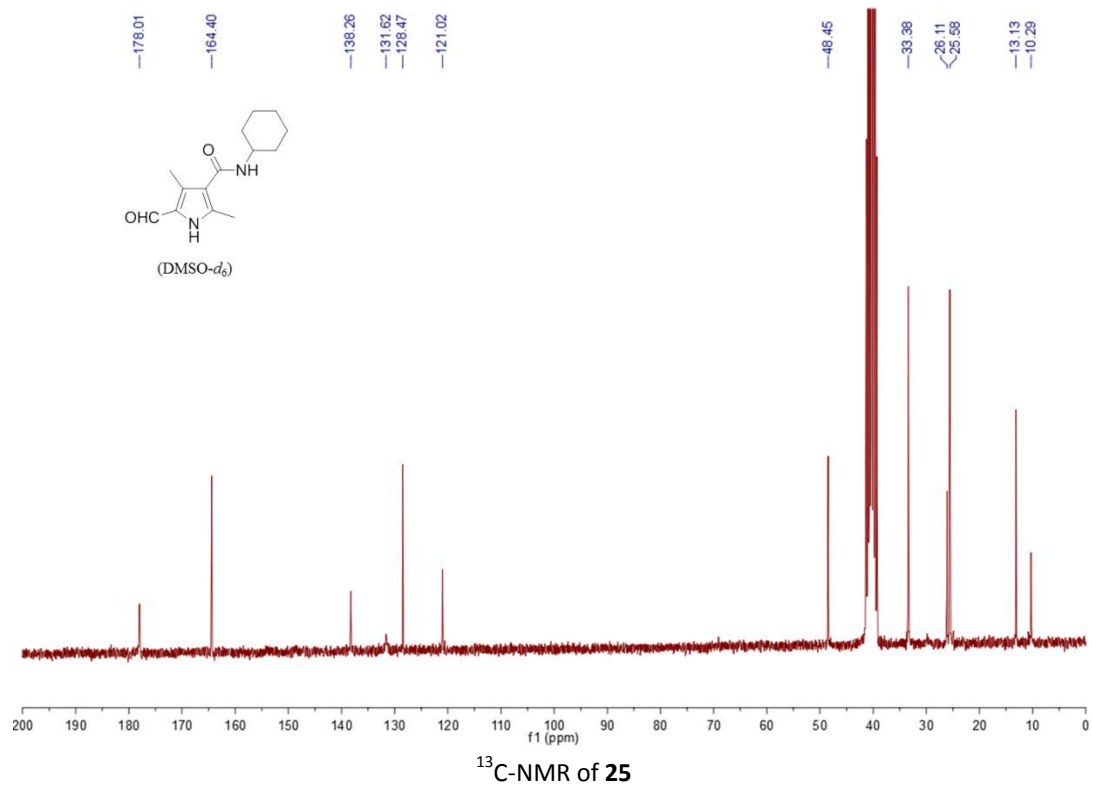

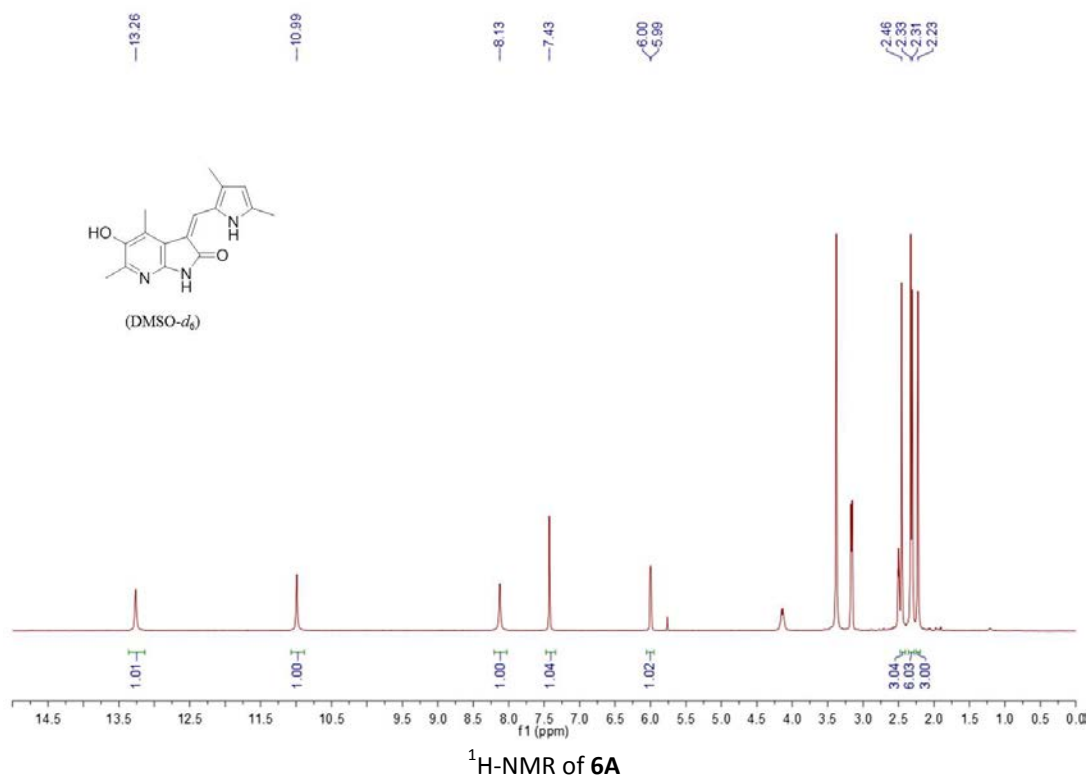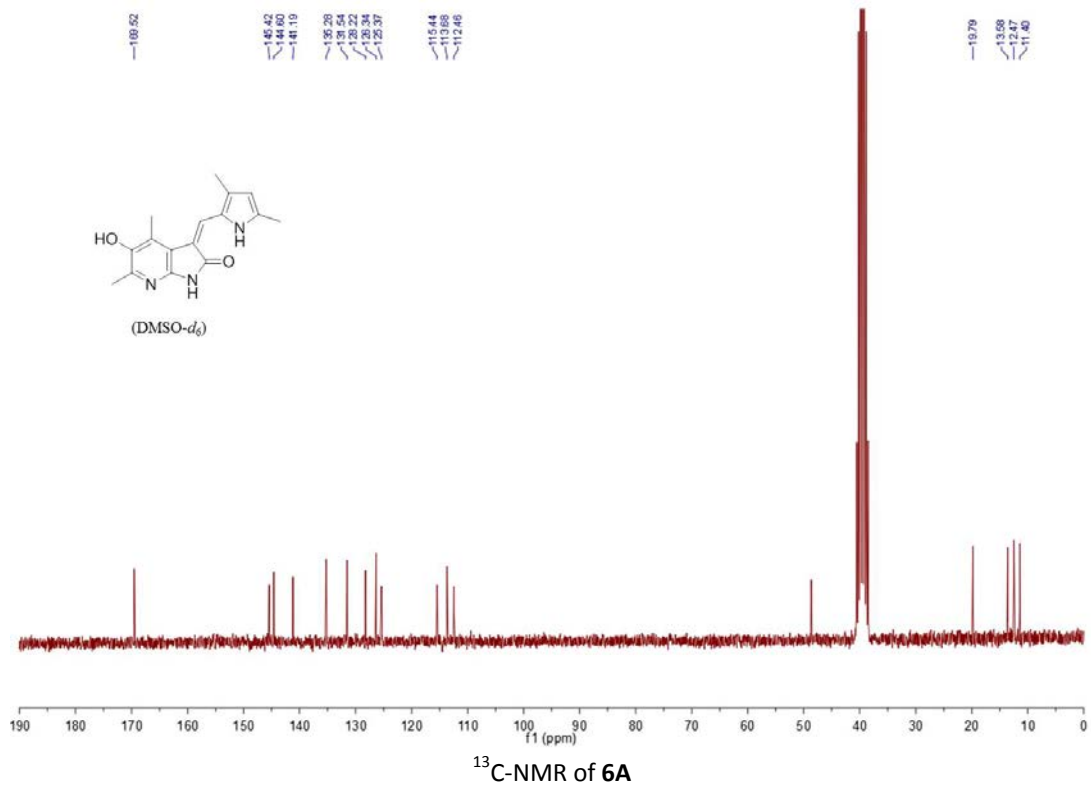

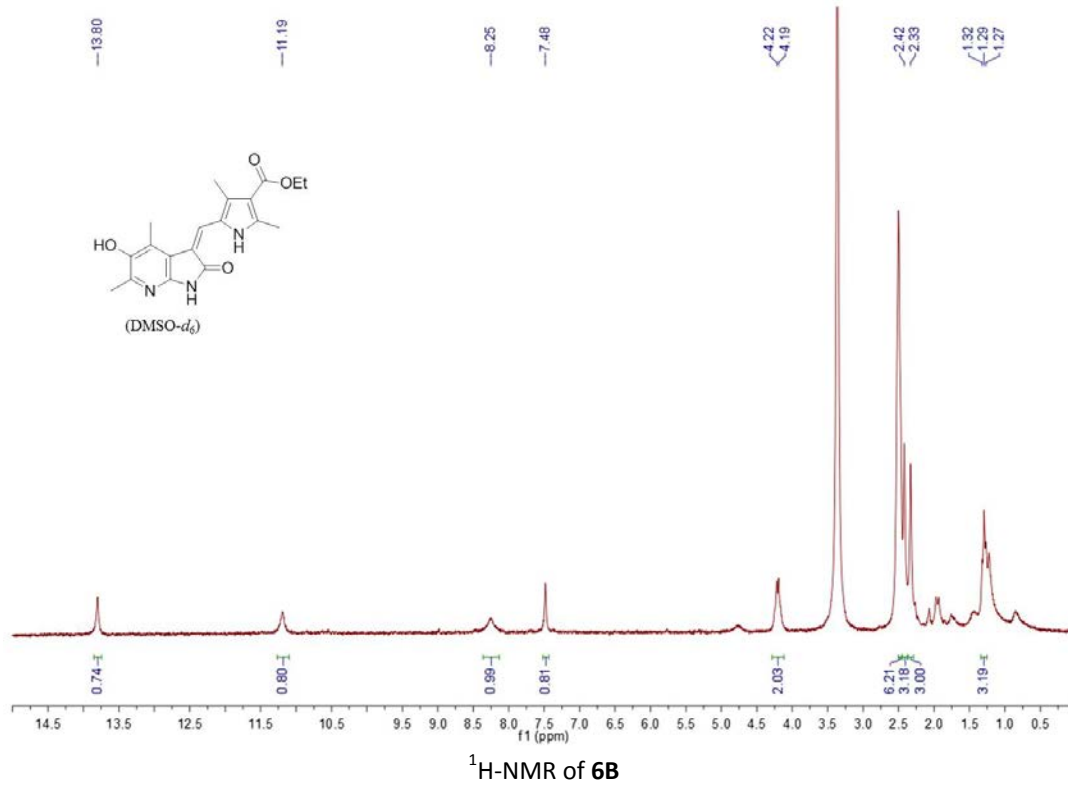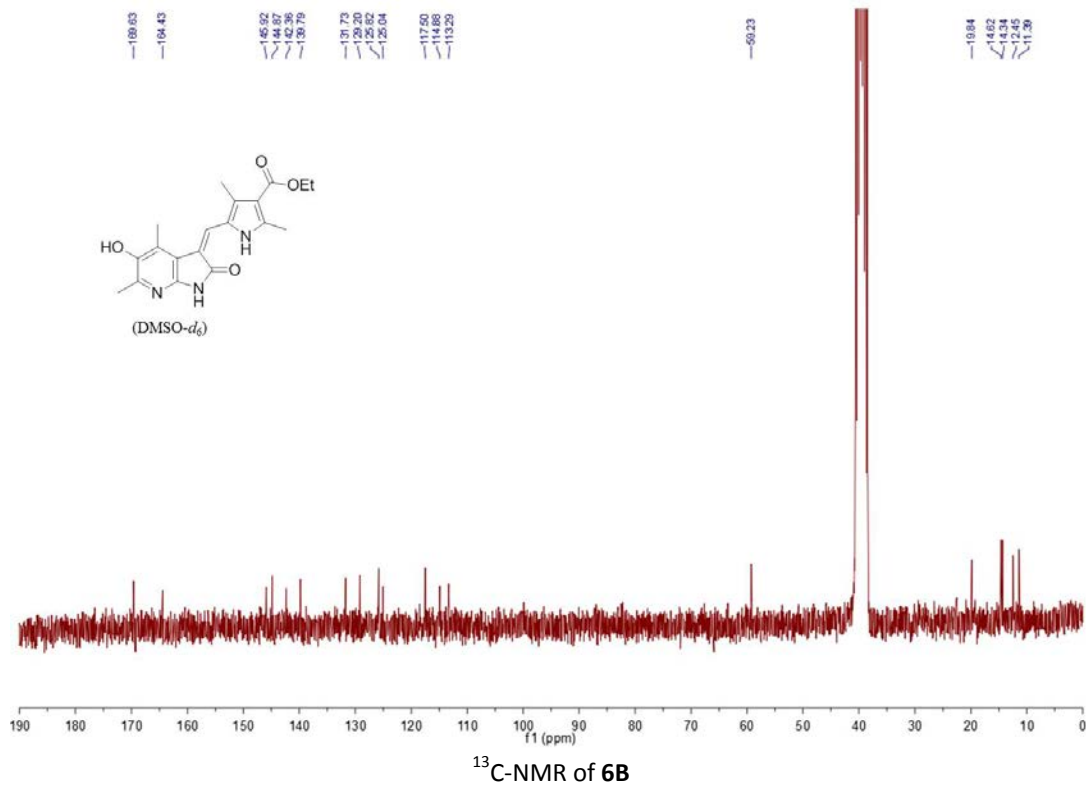

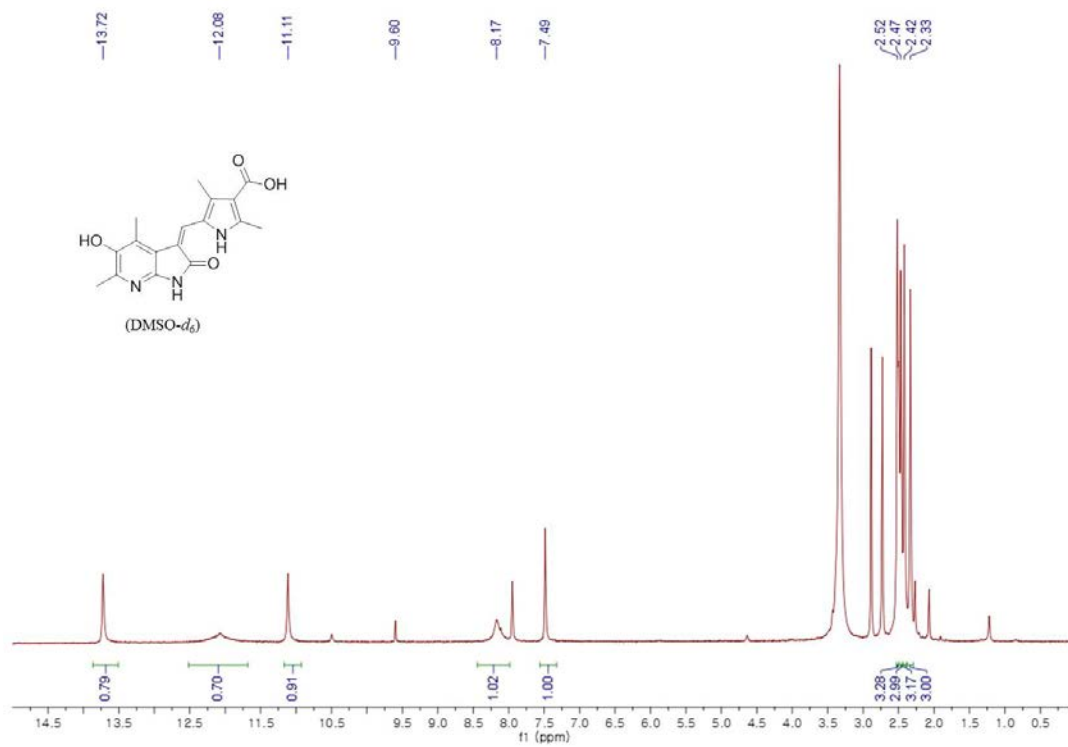

$^1\text{H-NMR}$  of 6C

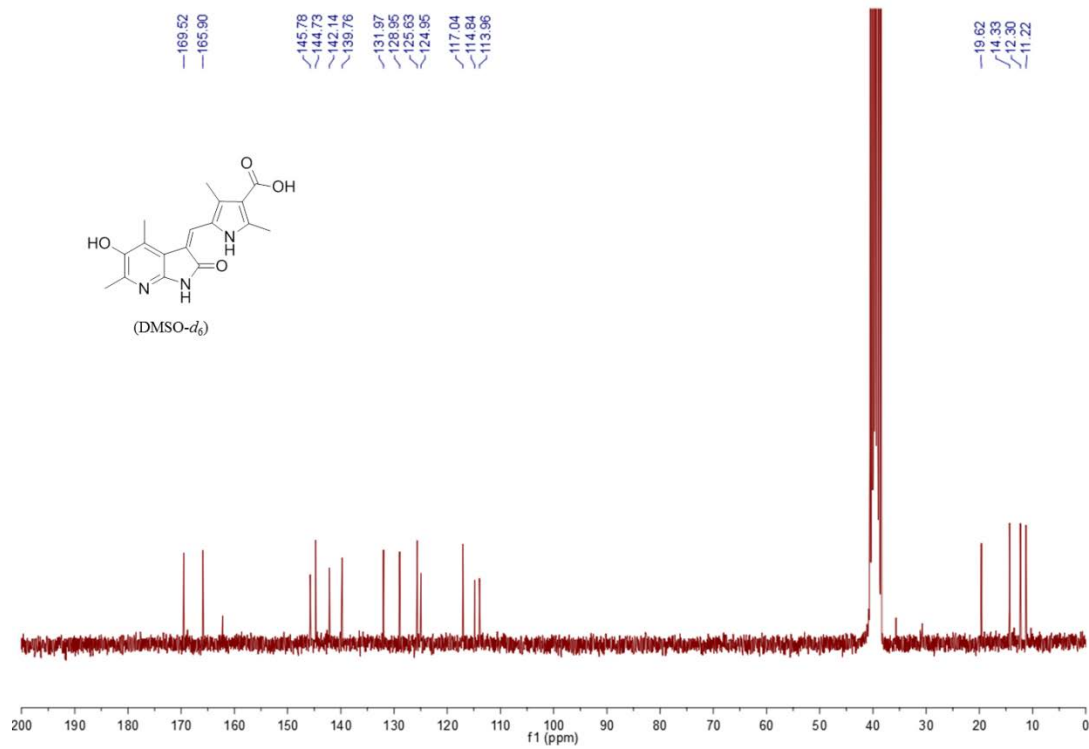

$^{13}\text{C-NMR}$  of 6C

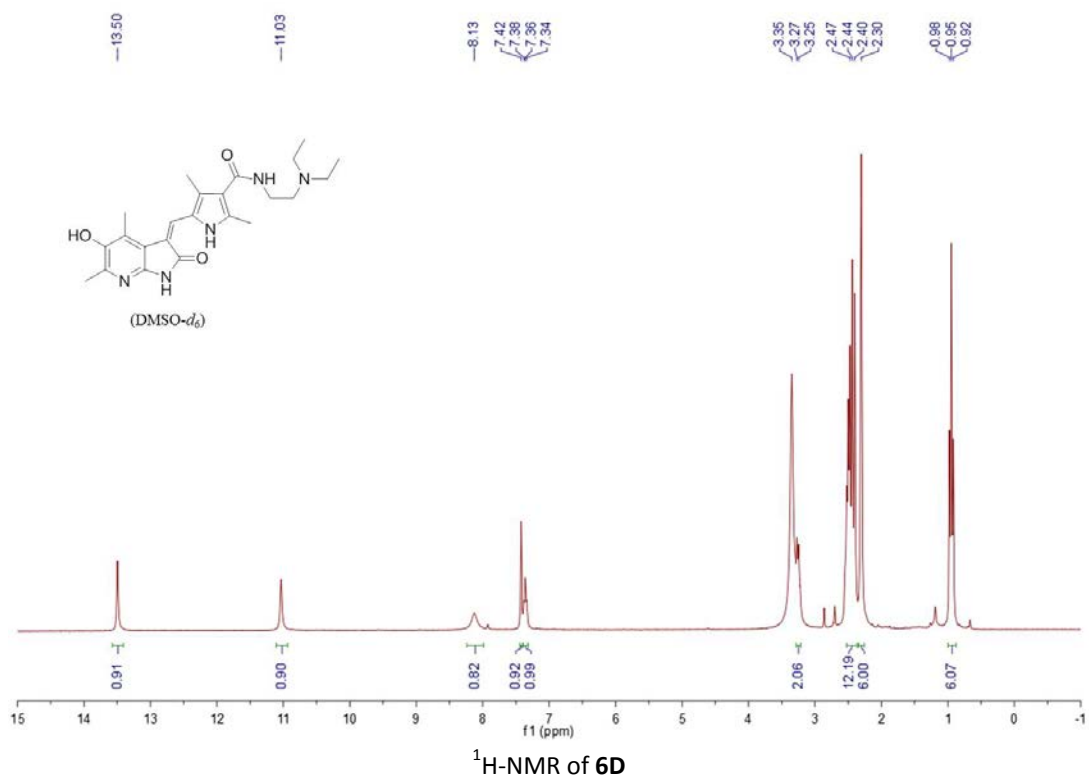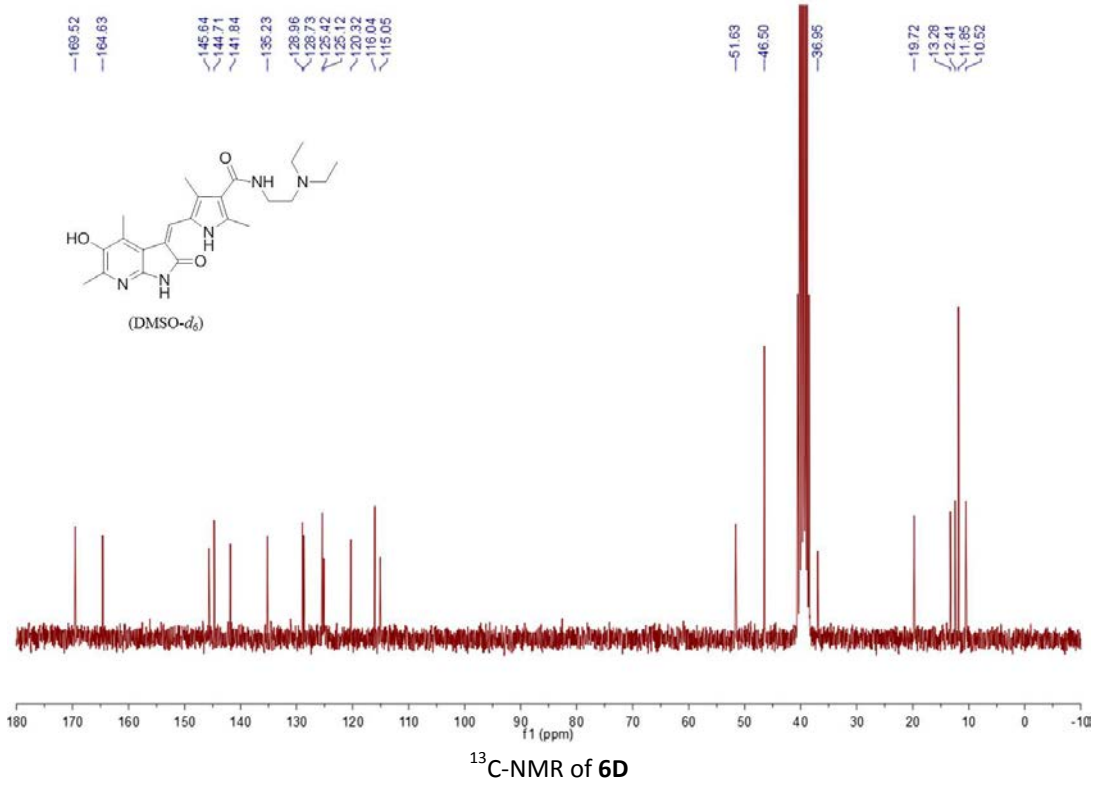

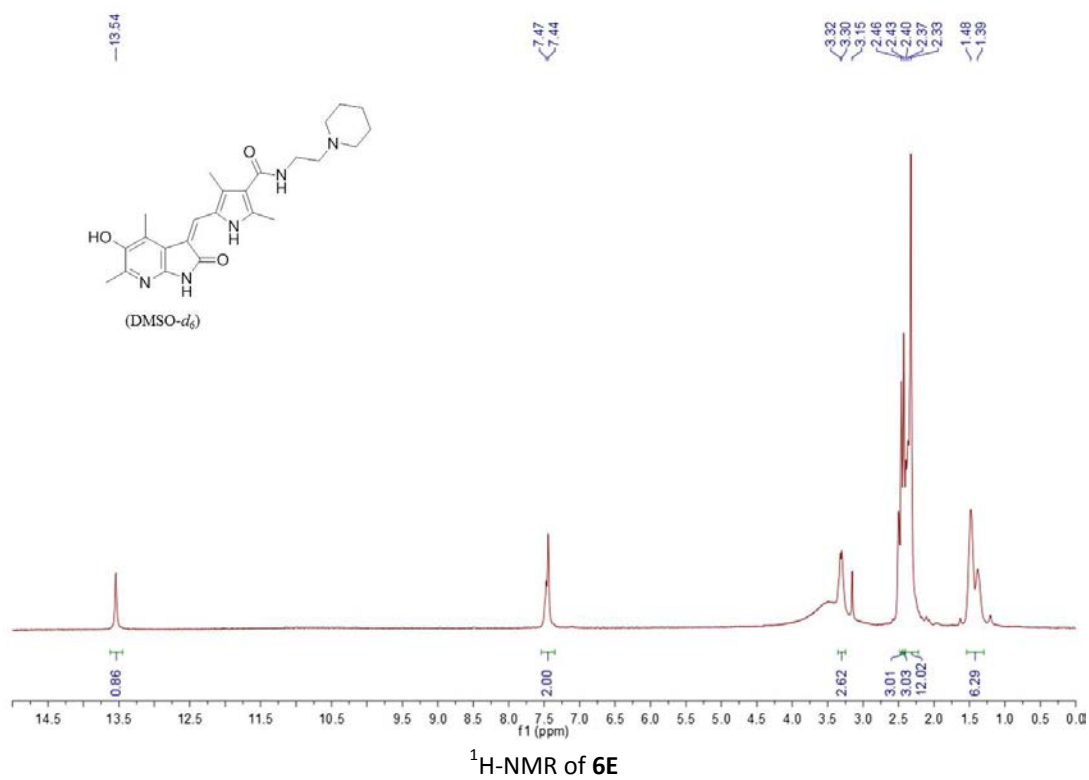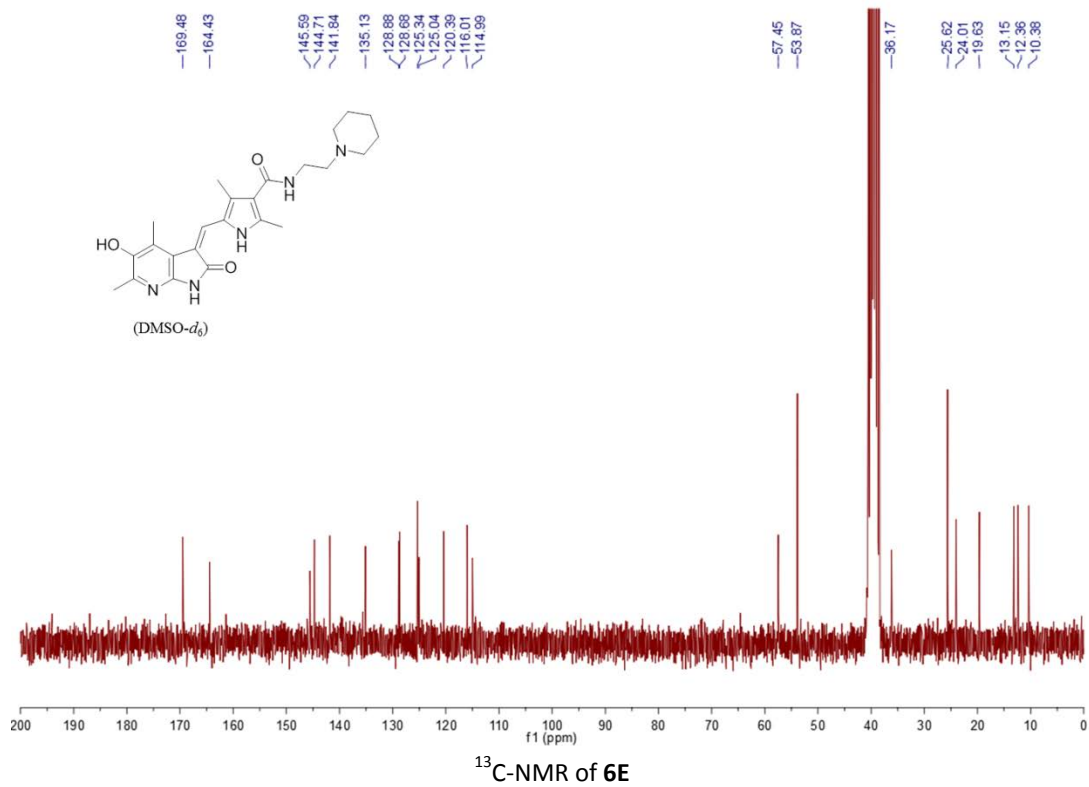



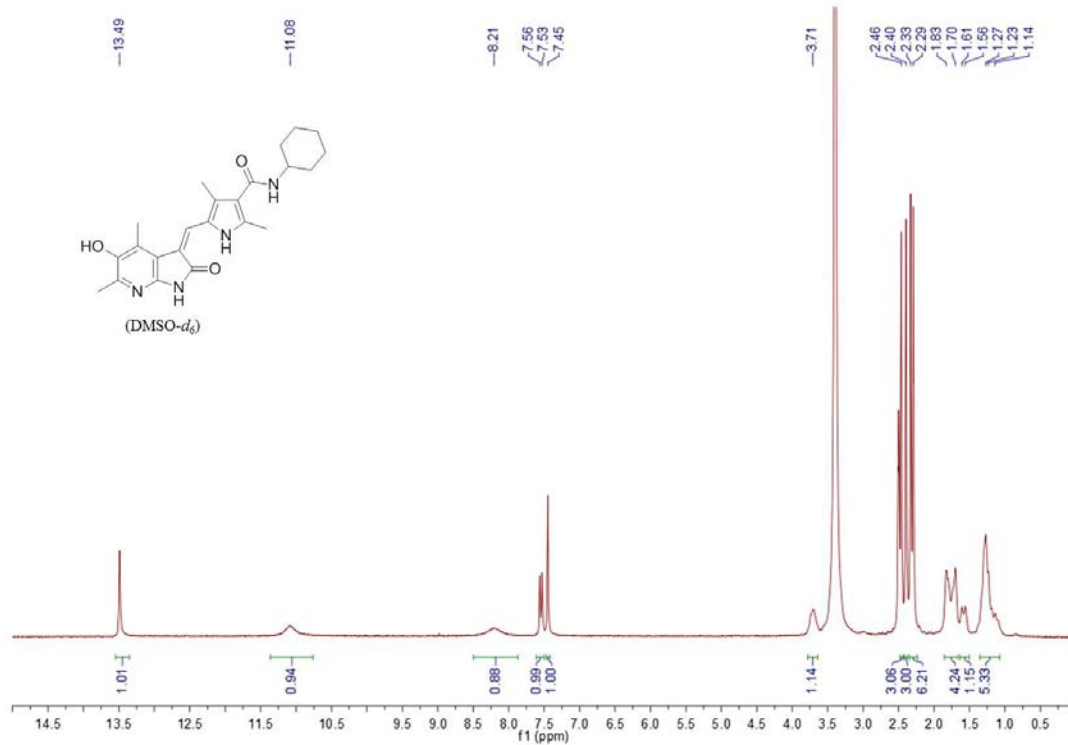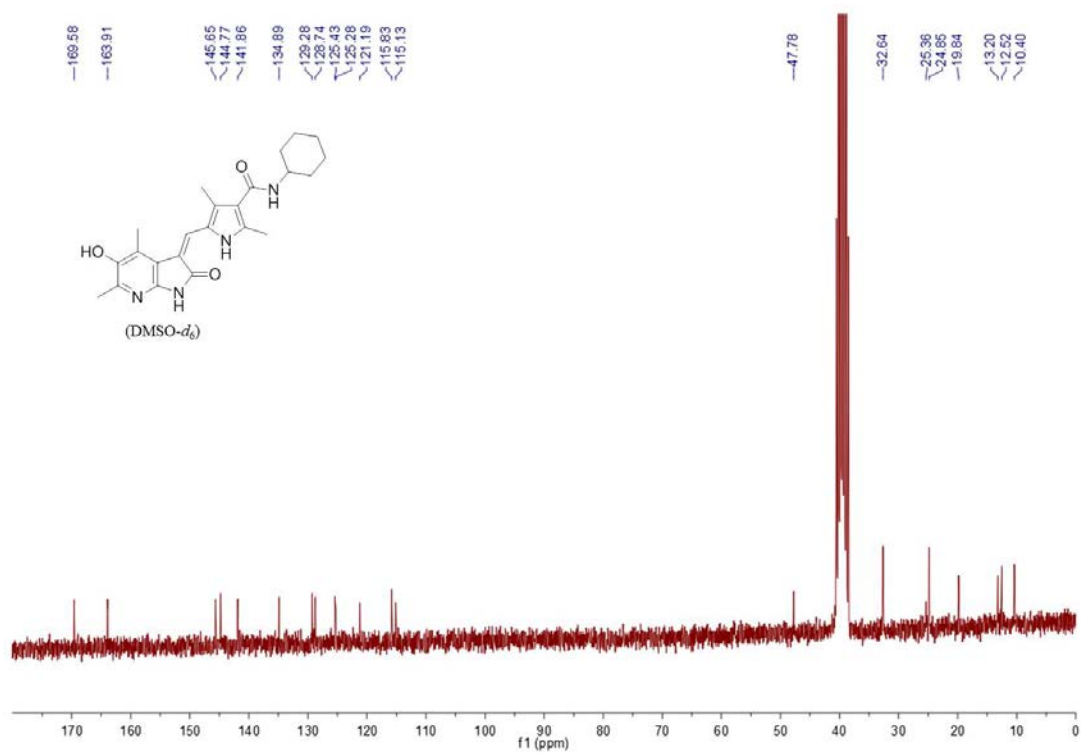

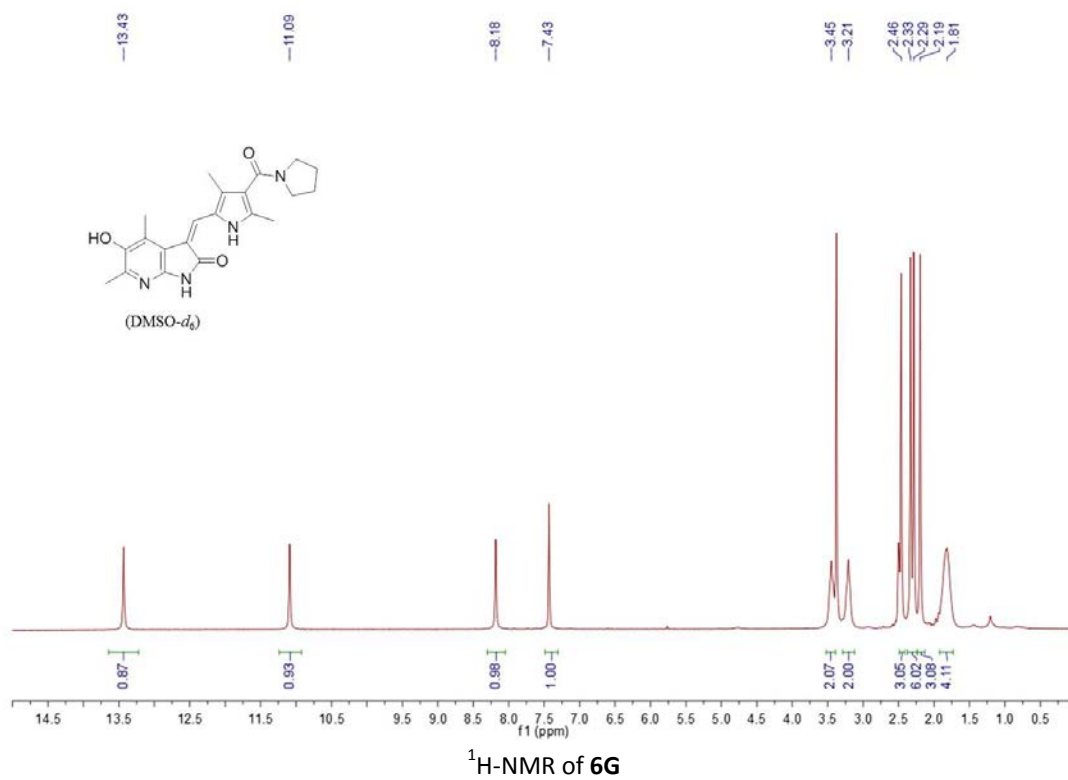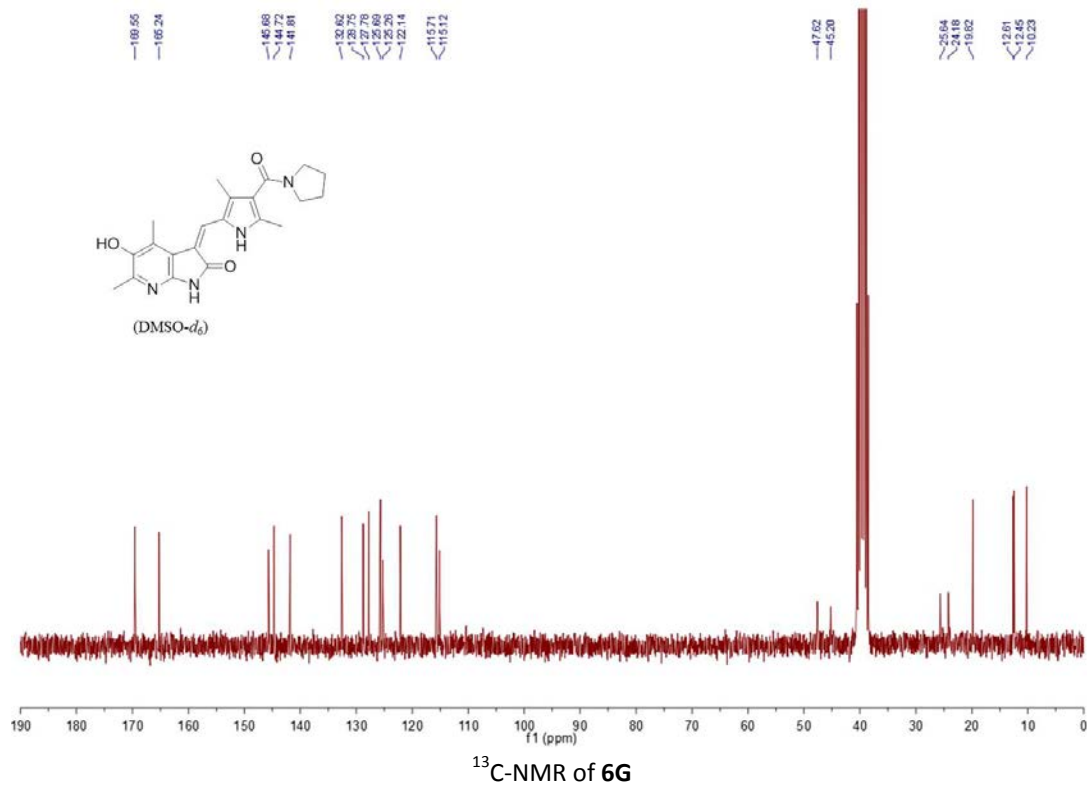

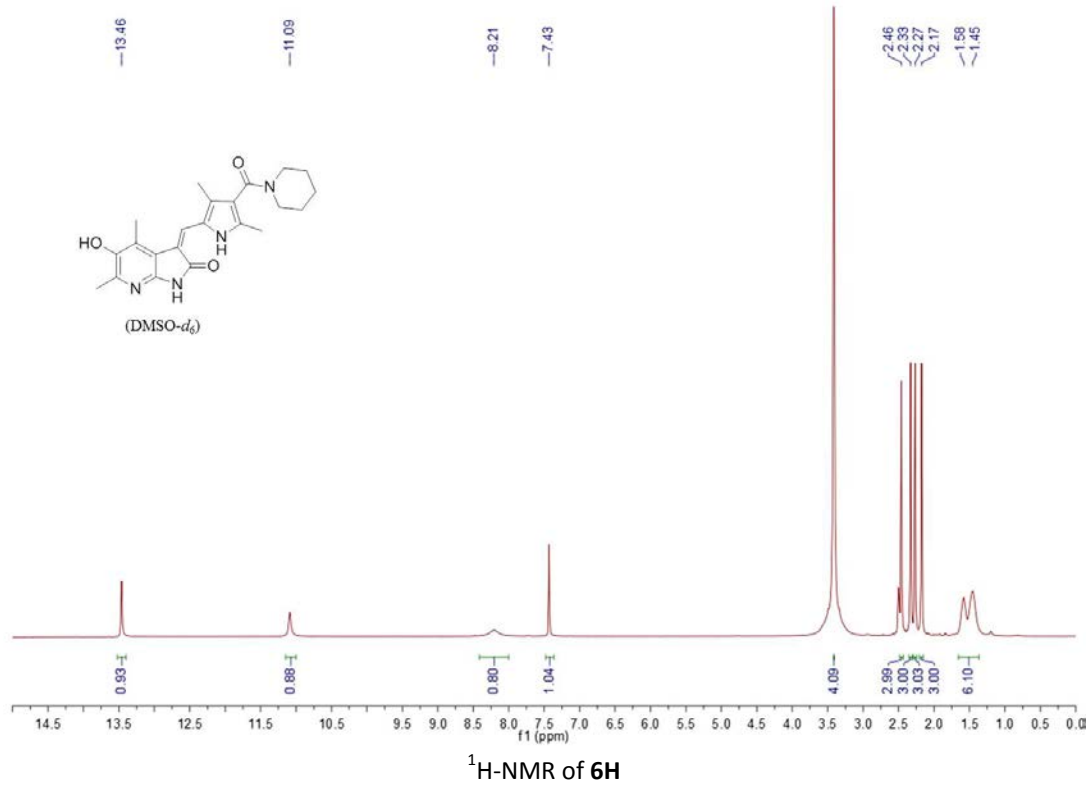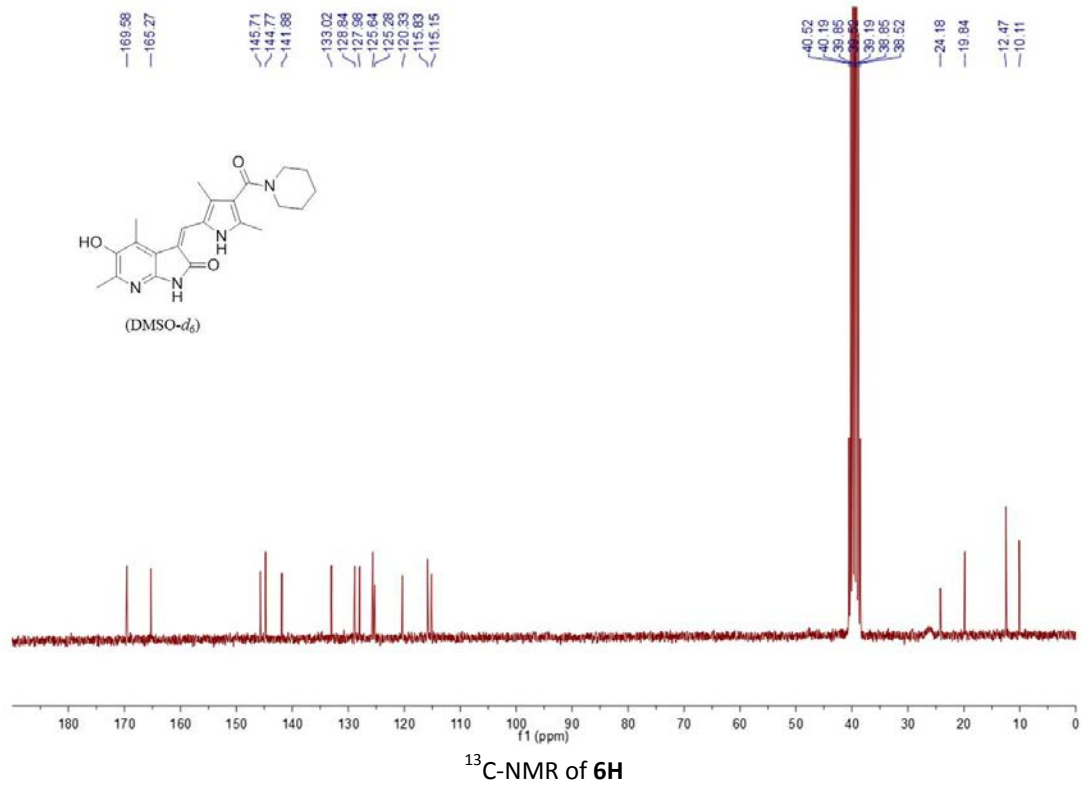

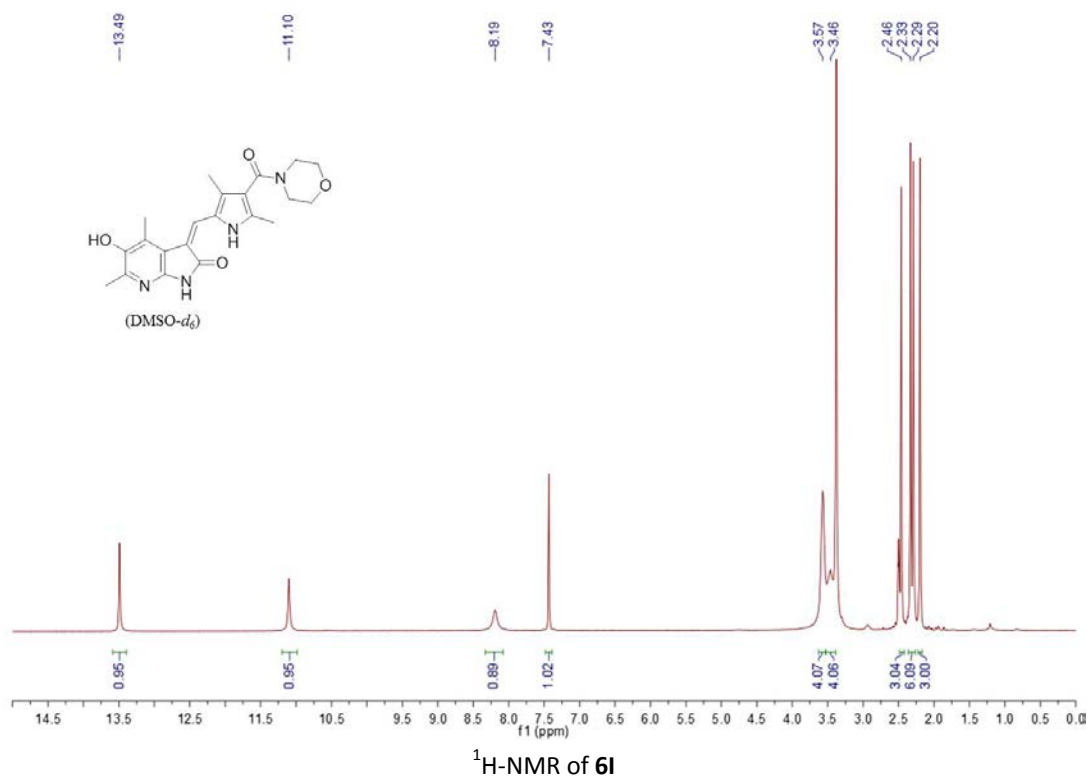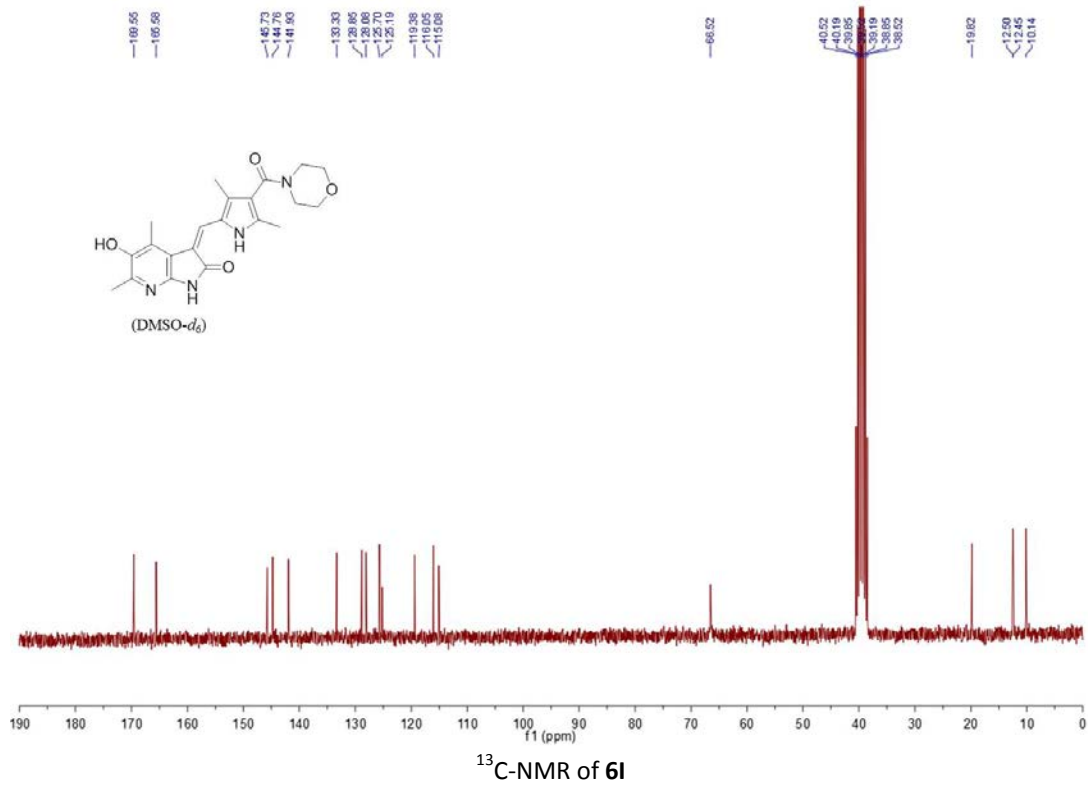

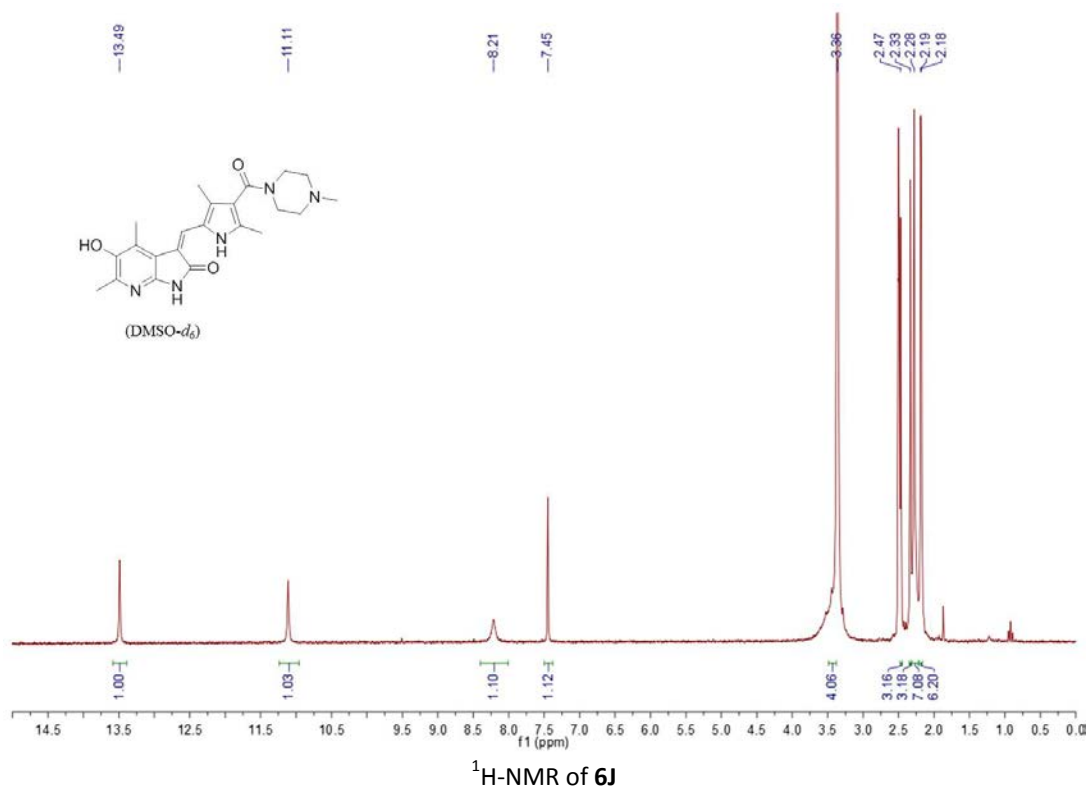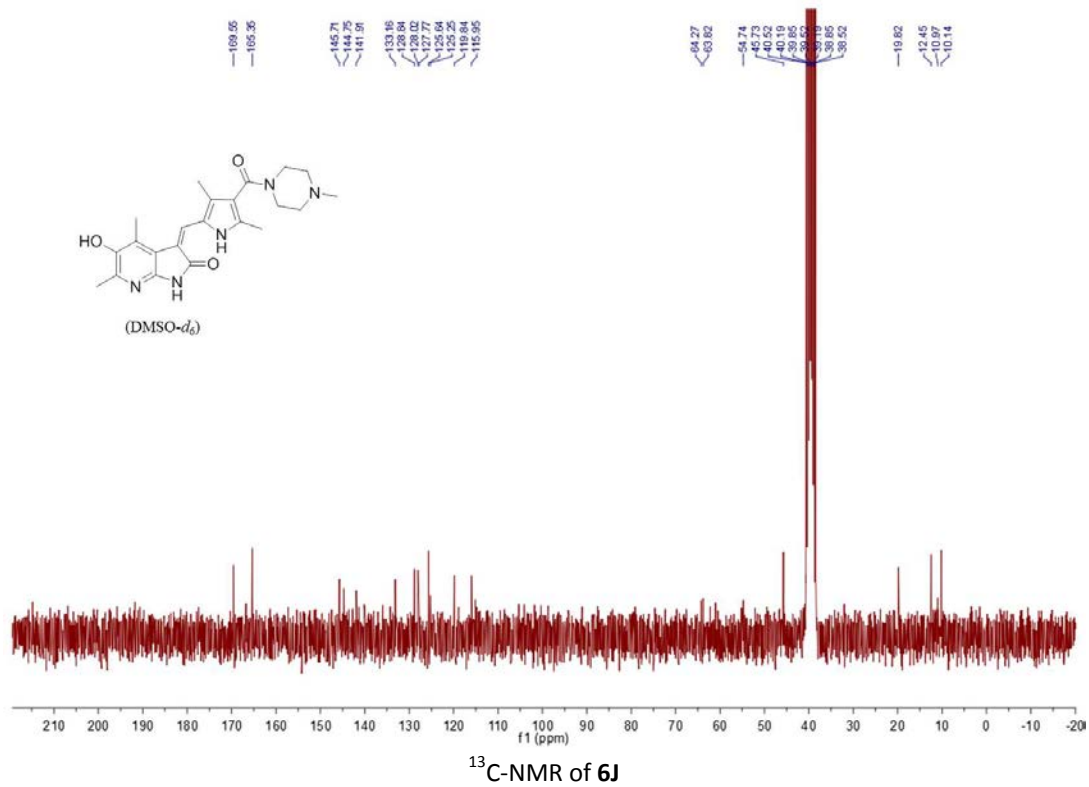

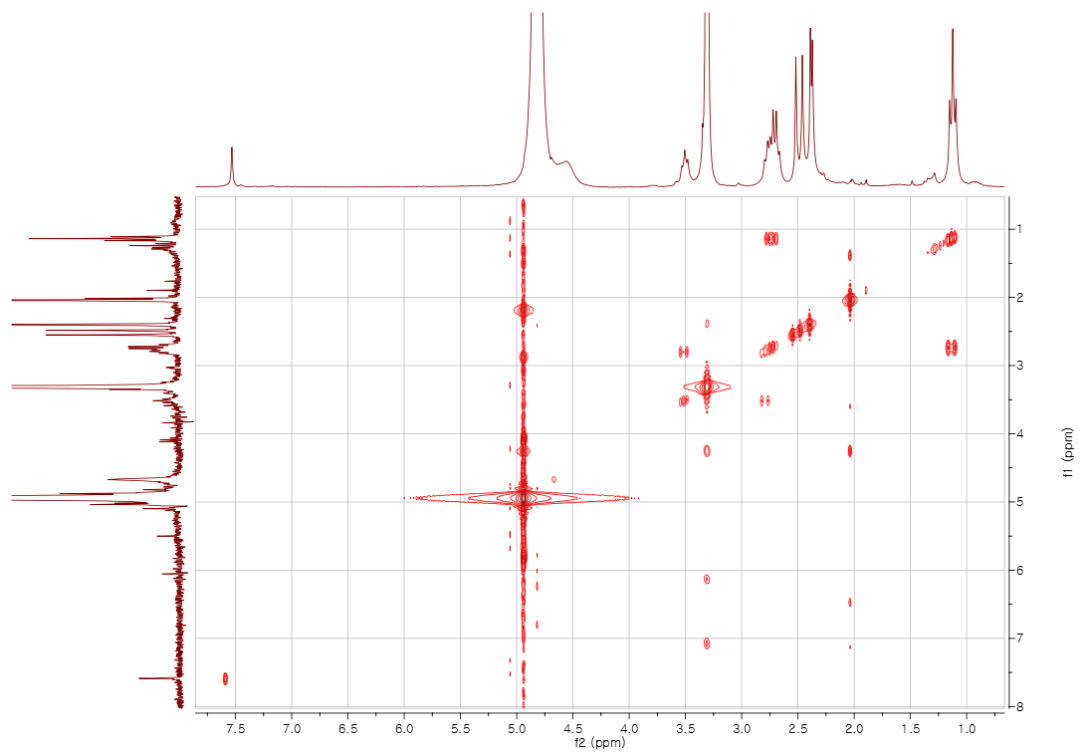

$^1\text{H}$ - $^1\text{H}$  COSY spectra of **6D** ( $\text{CD}_3\text{OD}$ )

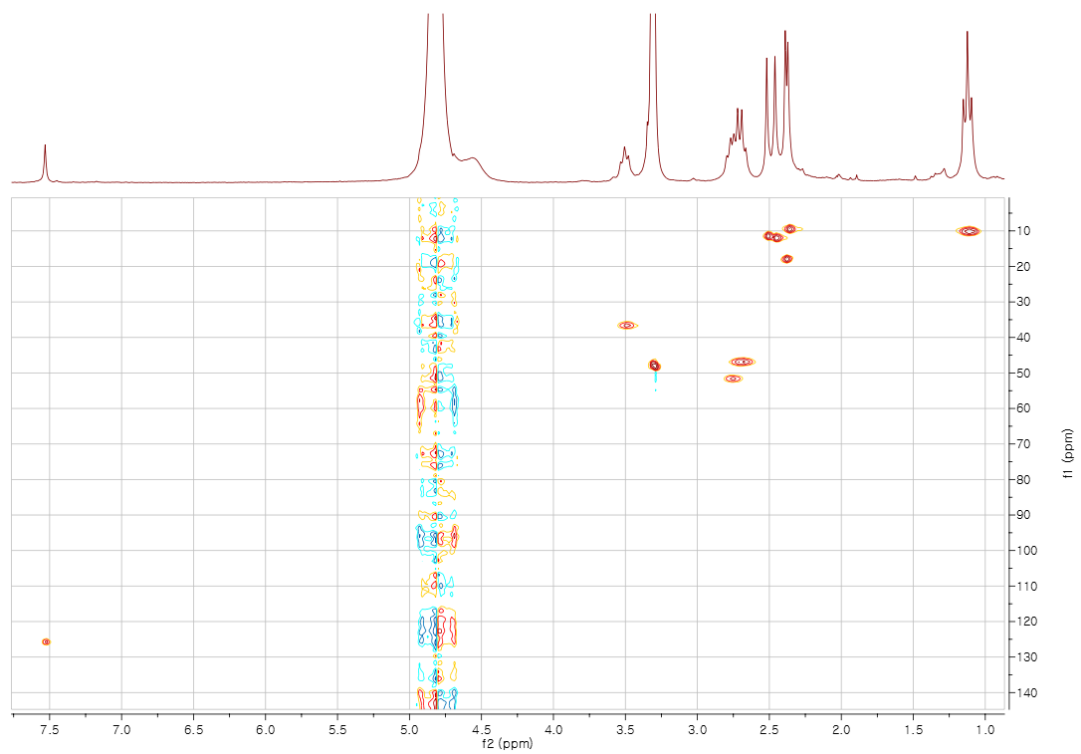

HMQC spectra of **6D** ( $\text{CD}_3\text{OD}$ )

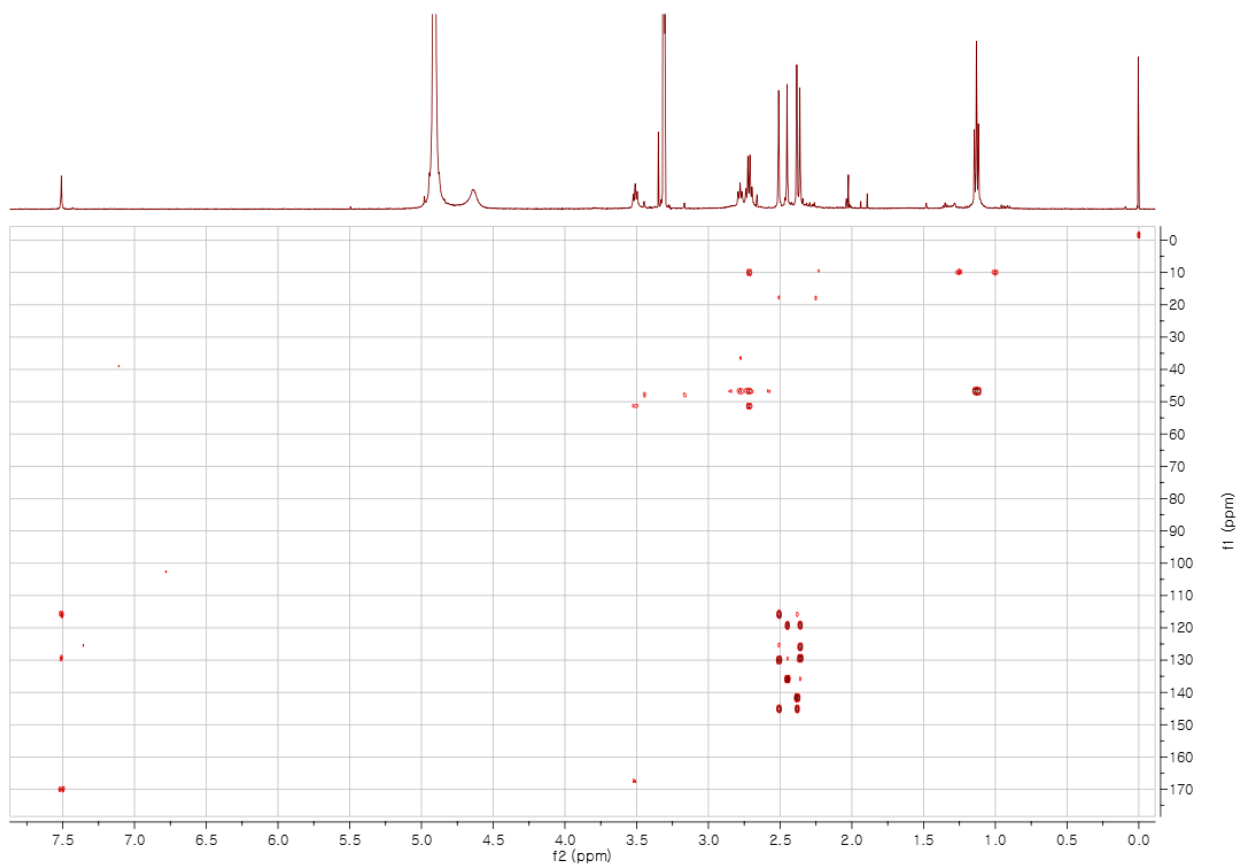

HMBC spectra of **6D** (CD<sub>3</sub>OD)

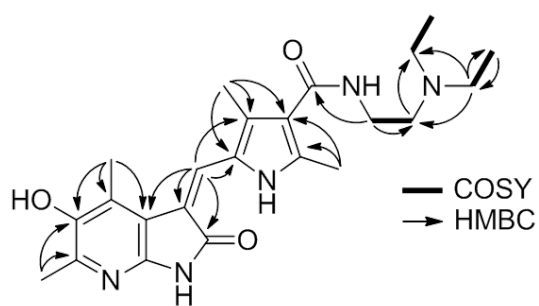

<sup>1</sup>H-<sup>1</sup>H COSY correlations and HMBC correlations of **6D**

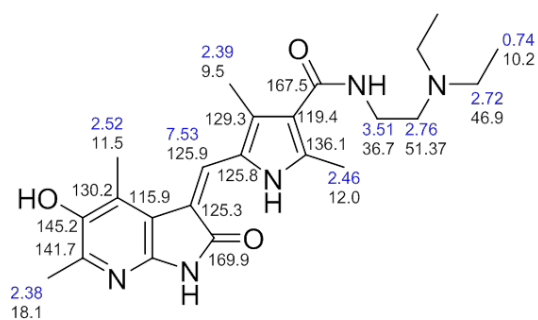

## HPLC chromatograms of 6A–6J

Column : Hydrosphere C18 250 X 4.6 mm 5  $\mu$ m  
 Solvent : A- Acetonitrile (0.1% Formic acid)  
 B- Water (0.1% Formic acid)

| Time | A (%) | B (%) | Flow rate (ml/min) |
|------|-------|-------|--------------------|
| 0    | 5     | 95    | 1                  |
| 5    | 5     | 95    | 1                  |
| 20   | 60    | 40    | 1                  |
| 25   | 60    | 40    | 1                  |
| 30   | 100   | 0     | 1                  |
| 40   | 100   | 0     | 1                  |

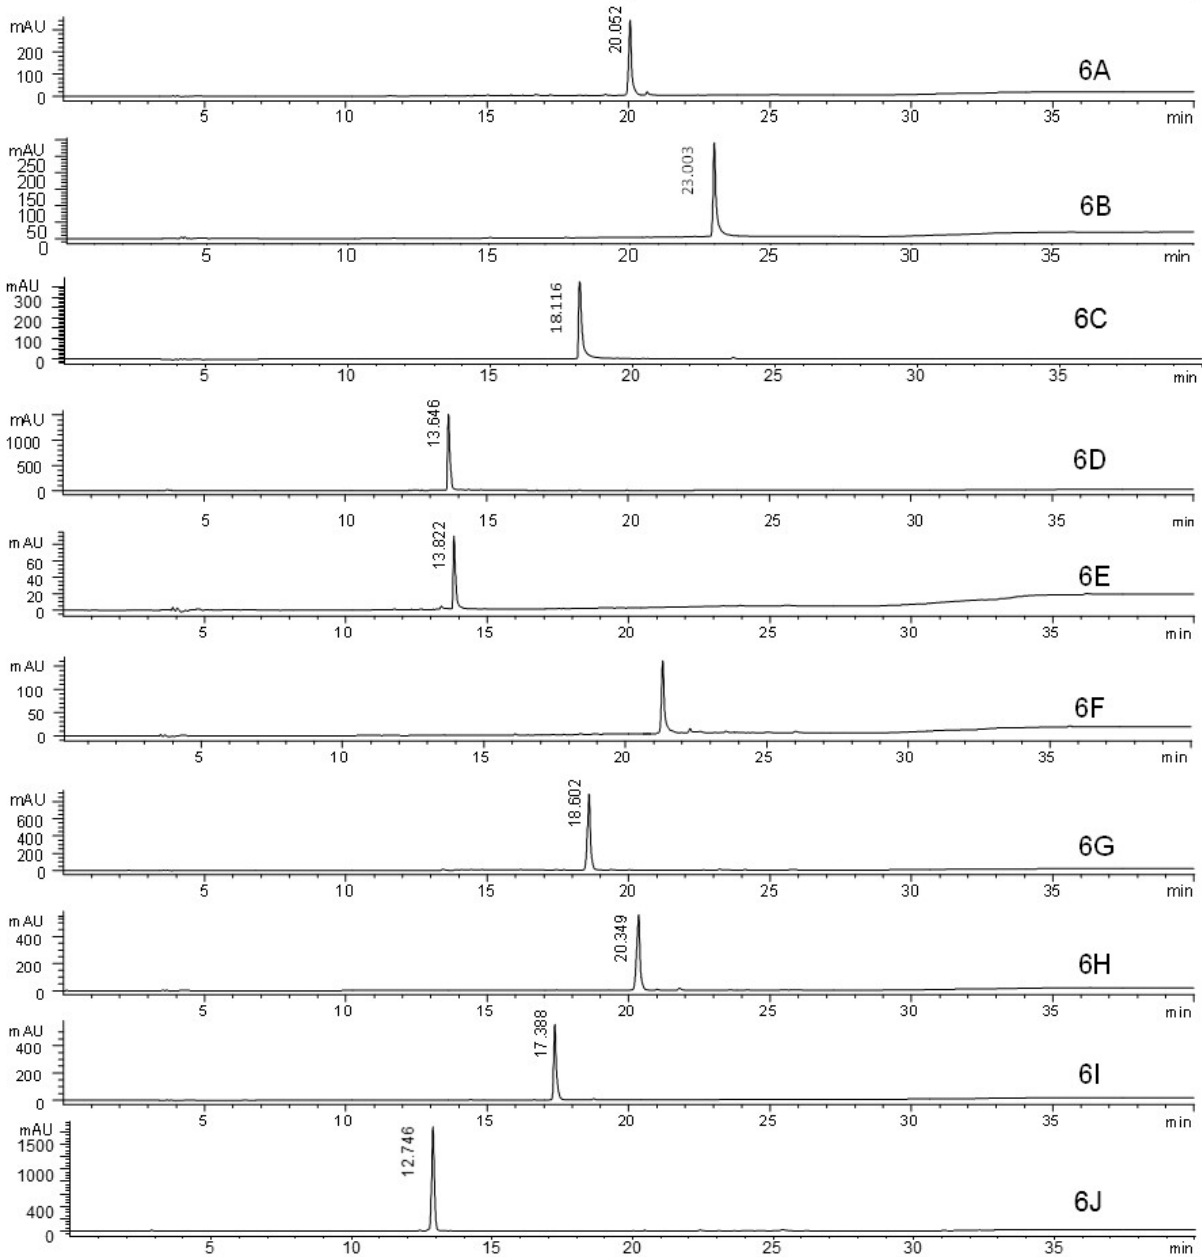

Supplement: c6ob00406g1.pdf [file c6ob00406g1.pdf]
